# Supplementary material for: Optimization of the Alizarin Red S Assay by Enhancing Mineralization of Osteoblasts
Source: MDPI journal article supplement (doi:10.3390/ijms24010723), 2022-12-31
Supplement: s1 [file s1]

**Table S1: Exemplary mineralization studies with or without the addition of calcium chloride and calcitonin.**

| Osteoblastic cell model                                              | Concentration of added CaCl <sub>2</sub> | Concentration of added calcitonin    | Method(s) used for quantification of mineralization                                       | First author and year of publication | Ref. in manuscript |
|----------------------------------------------------------------------|------------------------------------------|--------------------------------------|-------------------------------------------------------------------------------------------|--------------------------------------|--------------------|
| MC3T3-E1                                                             | 1.8, 2.8, 3.8 mM                         | -                                    | Alizarin red S staining<br>Von Kossa staining                                             | Yamauchi et al. 2004                 | [16]               |
| Fetal rat calvarial cells (FRC)                                      | 0.5 - 2.5 mM                             | -                                    | Von Kossa staining                                                                        | Dvorak et al., 2004                  | [17]               |
| MC3T3-E1                                                             | 1.8 – 50 mM                              | -                                    | Von Kossa staining                                                                        | Nakamura et al., 2010                | [30]               |
| Primary mesenchymal stem cells                                       | -                                        | -                                    | Alizarin Red S staining<br>Calcein Green staining                                         | Serguienko et al., 2018              | [5]                |
| Multipotent mouse mesenchymal progenitor cells (KS483)               | -                                        | -                                    | Alizarin Red S staining<br>Staining with fluorescent dye<br>Alkaline phosphatase activity | Moester et al., 2014                 | [6]                |
| Calvarial cells from 6- to 8 day-old neonatal CD-1 mice              | -                                        | -                                    | Staining with fluorescent dyes<br>Von Kossa staining<br>Alizarin Red S staining           | Wang et al., 2006                    | [7]                |
| Human mesenchymal stem cells                                         | -                                        | -                                    | Alizarin Red S staining<br>Arsenazo III calcium assay                                     | Gregory et al., 2004                 | [12]               |
| Human fetal osteoblasts, MG-63, MC3T3-E1, SaOs-2                     | -                                        | -                                    | Alizarin Red S staining<br>Von Kossa staining                                             | Lim et al., 2008                     | [31]               |
| Osteoblasts isolated from the calvariae of 1-day-old newborn SD rats | -                                        | Calcitonin-conditioned medium (3 nM) | Alizarin Red S staining                                                                   | Hsiao et al., 2020                   | [20]               |

CaCl<sub>2</sub>, calcium chloride
